# Supplementary material for: NLRP3 Contributes to Sarcopenia Associated to Dependency Recapitulating Inflammatory-Associated Muscle Degeneration
Source: MDPI journal article supplement (doi:10.3390/ijms25031439), 2024-01-24
Supplement: s1 [file s1]

**Table S1.** Study participant characteristics.

|                | Independent   | Dependent     | P-value | Significance |
|----------------|---------------|---------------|---------|--------------|
| N              | 30            | 30            | -       | -            |
| Age            | 84 ± 6        | 86 ± 5        | 0.1058  | N.S.         |
| Sex (women)    | 27 (90%)      | 26 (86.67%)   | >0.9999 | N.S.         |
| Bathel Index   | 100           | 38.5 ± 17.28  | <0.0001 | ****         |
| Charlson Index | 1.200 ± 1.157 | 1.900 ± 1.583 | 0.0794  | N.S.         |

Data are represented as the mean ± SD. N.S., not significant. \*\*\*\* P<0.0001

**Table S2.** Patients background information

| Pathologie                                   | Independent    | Dependent      | P-value | Significance |
|----------------------------------------------|----------------|----------------|---------|--------------|
| Hypertension                                 | 24 (80%)       | 20 (66.67%)    | 0.3817  | N.S.         |
| Diabetes                                     | 5 (16.67%)     | 7 (23.33%)     | 0.7480  | N.S.         |
| Dyslipidemia                                 | 10 (33.33%)    | 13 (43.33%)    | 0.5959  | N.S.         |
| Cardiac insufficiency                        | 2 (6.67%)      | 2 (6.67%)      | >0.9999 | N.S.         |
| Ischemic Cardiopathy (IC)                    | 9 (30%)        | 6 (20%)        | 0.5520  | N.S.         |
| Stroke                                       | 6 (20%)        | 6 (20%)        | >0.9999 | N.S.         |
| Chronic Obstructive Pulmonary Disease (COPD) | 0 (0%)         | 3 (10%)        | 0.2375  | N.S.         |
| Mild-moderate dementia                       | 3 (10%)        | 18 (60%)       | <0.0001 | ****         |
| Creatinine (md/dL)                           | 0.912 ± 0.0468 | 1.145 ± 0.1699 | 0.7325  | N.S.         |
| Chronic Kidney Disease (CKD)                 | 0 (0%)         | 3 (10%)        | 0.2375  | N.S.         |
| Cancer                                       | 6 (20%)        | 8 (26.67%)     | 0.7611  | N.S.         |

Data are represented as the mean ± SEM. N.S., not significant. \*\*\*\* P<0.0001

**Table S3.** White blood cell (WBC) count and red blood cell (RBC).

|              | Independent    | Dependent     | Units    | P-value | Significance |
|--------------|----------------|---------------|----------|---------|--------------|
| Leucocytes   | 8.526 ± 0.583  | 9.331 ± 0.826 | *10e3/uL | 0.3678  | N.S.         |
| Neutrophils  | 6.415 ± 0.5707 | 7.257 ± 0.805 | *10e3/uL | 0.5205  | N.S.         |
| Linfocytes   | 1.188 ± 0.092  | 1.132 ± 0.091 | *10e3/uL | 0.6703  | N.S.         |
| Monocytes    | 0.747 ± 0.060  | 0.731 ± 0.068 | *10e3/uL | 0.5203  | N.S.         |
| Eosinophils  | 0.145 ± 0.027  | 0.189 ± 0.028 | *10e3/uL | 0.1448  | N.S.         |
| Basophils    | 0.029 ± 0.003  | 0.032 ± 0.004 | *10e3/uL | 0.9226  | N.S.         |
| Erythrocytes | 3.8 ± 0.089    | 15.71 ± 11.98 | *10e6/uL | 0.7832  | N.S.         |

Data are represented as mean ± SEM. N.S., not significant.

Table S4. List of primers and reference genes

| Name  | Forward                  | Reverse                | Reference Ensembl  | Reference NM   |
|-------|--------------------------|------------------------|--------------------|----------------|
| NLRP3 | CGAGGGGTCAGACAGAGAAG     | TTCCTGGCATATCACAGTGG   | ENST00000336119.8  | NM_001243133.2 |
| ASC   | AAGCCAGGCCTGCACTTTAT     | CAGGCTGGTGTGAAACTGAA   | ENST00000247470.10 | NM_013258.5    |
| GSDMD | GCTCCAGCACCTCAATGAAT     | GACCGTCTTCTTCTGGCTCA   | ENST00000262580.9  | NM_024736.7    |
| NEK7  | AGCAATCACAAGGAATGCAAG    | GGTACTCCATCCAAGAGACAGG | ENST00000367385.9  | NM_133494.3    |
| MYH2  | GATAAGATCCTGGCAGAATGGA   | TCTGCAATCTGTTCCGTGAG   | ENST00000245503.10 | NM_017534.6    |
| MYH3  | ACAGACAGCGCCATTGACA      | AGGCTGTTTTGTCAGCCACT   | ENST00000583535.6  | NM_002470.4    |
| HPRT1 | ATGGACTGATTATGGACAGGACTG | TCCAGCAGGTCAGCAAAGAAC  | ENST00000298556.8  | NM_000194.3    |

Table S5. Antibody table. Details of sources of antibodies used for Western blotting.

| Antibody                            | Manufacturer   | Reference |
|-------------------------------------|----------------|-----------|
| Anti Phospho-Histone H2A.X (Ser139) | Cell Signaling | #9718     |
| Anti p16 INK4A (F-12)               | Santa Cruz     | sc-1661   |
| Anti RIP3 (E7A7F) XP                | Cell Signaling | #10188    |
| Anti Rabbit IgG, HRP                | Cell Signaling | #7074     |
| Anti Mouse IgG, HRP                 | Cell Signaling | #7076     |
